# Supplementary material for: Cost-effectiveness analysis of bundled innovative devices versus standard approach in the prevention of unscheduled peripheral venous catheters removal due to complications in France
Source: PLoS One. 2022 Jun 14;17(6):e0269750. doi: 10.1371/journal.pone.0269750 (PMC9197036; doi:10.1371/journal.pone.0269750)
Supplement: S1 File — CHG: Chlorhexidine Gluconate gel; PVI: povidone iodine-alcohol solution; PVC: Peripheral Venous Catheter. (XLSX) [file pone.0269750.s001.xlsx]

## Sheet: CHG Control
Control Group		First catheter placement					Catheter replacement (second catheter if suited)						Complications						Daily Use
			Supplies	Quantity	Price (€)	Time (seconds)	First catheter removal						Local infection / Phlebitis						3 nursing visits per day and 1 intravenous treatment (IV) 3 times per day
		Hygiene						Supplies	Quantity	Price (€)	Time (seconds)		Treatment once a day for 3 days							Supplies	Quantity	Price (€)	Time (seconds)
			Pair of non-sterile gloves	1	0.14		Hygiene							Supplies	Quantity	Price (€)	Time (seconds)		Hygiene
			Hydro alcoholic solution	3 mL	0.007			Pair of non-sterile gloves	1	0.14			Hygiene							Pair of non-sterile gloves	3	0.42
			Surface disinfectant	10 mL	0.00015			Hydro alcoholic solution	3 mL	0.007				Pair of non-sterile gloves	1	0.14				Hydro alcoholic solution	3 mL x 3	0.021
			Wipe	1	0.02			Surface disinfectant	10 mL	0.00015				Hydro alcoholic solution	3 mL	0.007				Surface disinfectant	10 mL x 3	0.00045
		Infusion line						Wipe	1	0.02				Surface disinfectant	10 mL	0.00015				Wipe	3	0.06
			Tubing + 3-way valve	1	0.35		Removal							Wipe	1	0.02			Cleaning
			Solute	1	0.62			Compresses	1	0.01			Material							Antiseptic (handling)	3 mL x 3	0.081
		Venous catheter						Plasters	10 cm	0.0044				Compresses	2	0.02				Compresses (handling)	2 x 3	0.06
			Insyte Autogard Catheter	1	0.53		Nursing Time							Alcohol	3 mL	0.0066				Tap stoppers	3	0.09
		Antiseptic (for skin)						Preparation of the material		0.2745	30			Strips	1	0.94			Treatment
			Chloraprep	1	0.516			Explaining and informing the patient		0.2745	30			Paracetamol 500mg	8	0.032				Solute	1	0.62
		Means of attachment						Installation of the patient		0.549	60		Nursing time			Cost (€)	Time (seconds)		Nursing time			Cost (€)	Time (seconds)
			Compresses (handling)	2	0.02			Hand washing/gloves		0.549	60			Preparation of the material		0.2745	30			Preparation of the material		0.549	60
			Polyurethane dressing	1	0.27			Removal of dressing/catheter+cleaning		0.41175	45			Explaining and informing the patient		0.2745	30			Explanation and information to the patient		0.2745	30
			Adhesive strips	1	0.3		Waste							Patient set-up/examination		0.549	60			Patient set-up / puncture site inspection		0.549	60
		Nursing time (seconds)			Cost (€)	Time (seconds)		Waste management (g)	117	0.0757283				Washing of hands/gloves		0.549	60			Washing of hands / gloves		0.549	60
		30	Verification of the prescription		0.2745	30				Cost (€)				Application of compresses + bandages		0.2745	30			Disinfection of Treatment injection site		0.2745	30
		90	Preparation of the material		0.8235	90		Total Cost Nursing Time		2.05875				Cleaning of trolley		0.41175	45			Drain tubing		0.0915	10
		30	Explain and inform the patient		0.2745	30		Total Cost Material		0.257278				Traceability		0.549	60			Treatment injection		0.2745	30
		60	Installation of the patient		0.549	60		Total Cost First catheter Removal		2.31603			Waste							Recalibrate infusion rate		0.0915	10
		60	Washing of hands / gloves		0.549	60								Waste management (g)	192	0.124272				Cleaning of trolley		0.41175	45
		30	Purge tubing		0.13725	15	Second catheter placement													Traceability		0.549	60
		15	Opening the material		0.2745	30		Supplies	Quantity	Price (€)	Time (seconds)			Total Cost Nursing Time	x 3	8.64675			Waste
		30	Locating the vein		0.2745	30	Hygiene							Total Cost Material	x 3	3.62152				Waste management (g)	143	0.0925568
		45	Antispasmodic application		0.41175	45		Pair of non-sterile gloves	1	0.14				Total Cost for Complication		12.2683
		60	Placement of the catheter		0.549	60		Hydro alcoholic solution	3 mL	0.007										Total Cost Nursing Time	x 3	10.8428
		15	Connecting the infusion line		0.13725	15	Infusion line						Occlusion							Total Cost Material		1.44501
		30	Fixation of the catheter / dressing		0.2745	30		Tubing + 3-way valve	1	0.35				Supplies	Quantity	Price (€)	Time (seconds)			Total Cost for daily use		12.2878
		45	Checking the patency of the vascular access		0.13725	15		Solute	1	0.62			Hygiene
		60	Cleaning		0.41175	45	Venous catheter							Pair of non-sterile gloves	1	0.14
			Traceability		0.549	60	615	Insyte Autogard Catheter	1	0.53				Hydro alcoholic solution	3 mL	0.007
		Waste					Antiseptic (for skin)							Surface disinfectant	10 mL	0.00015
			Waste management (g)	44	0.028479			Chloraprep	1	0.516				Wipe	1	0.02
							Means of attachment						Material
			Total Cost Nursing Time		5.62725			Compresses (handling)	2	0.02				Compresses (handling)	2	0.02
			Total Cost Material		2.80163			Polyurethane dressing	1	0.27				Antiseptic (handling)	3 mL	0.027
			Total Cost for first catheter placement		8.42888			Adhesive strips	1	0.3				Needle 18G	1	0.01
							Nursing time			Cost (€)	Time (seconds)			Saline 10 mL	1	0.07
								Verification of the prescription		0.2745	30			Syringe 10 mL	1	0.04
								Preparation of the material		0.8235	90		Nursing time			Cost (€)	Time (seconds)
								Explain and inform the patient		0.549	60			Preparation of the material		0.549	60
								Installation of the patient		0.549	60			Explaining and informing the patient		0.2745	30
								Washing of hands / gloves		0.13725	15			Installation of the patient		0.549	60
								Purge tubing		0.2745	30			Washing of hands / gloves		0.549	60
								Opening the material		0.549	60			Syringe preparation		0.13725	15
								Locating the vein		0.41175	45			Flush / test		0.2745	30
								Antispasmodic application		0.8235	90			Cleaning of trolley		0.41175	45
								Placement of the catheter		0.13725	15			Traceability		0.549	60
								Connecting the infusion line		0.2745	30		Waste
								Fixation of the catheter / dressing		0.13725	15			Waste management (g)	48	0.031068
								Checking the patency of the vascular access		0.41175	45
								Cleaning		0.549	60			Total Cost Nursing Time		3.294
							Waste							Total Cost Material		0.365218
								Waste management (g)	27	0.0174758				Total Cost for Complication		3.65922
								Total Cost Nursing Time		5.90175			Diffusion
								Total Cost Material		2.77048			Treatment once a day for 1 day
								Total Cost for second catheter placement		8.67223				Supplies	Quantity	Price (€)	Time (seconds)
													Hygiene
CHG: Chlorhexidine Gluconate gel														Pair of non-sterile gloves	1	0.14
														Hydro alcoholic solution	3 mL	0.007
														Surface disinfectant	10 mL	0.00015
														Wipe	1	0.02
													Material
														Compresses	2	0.02
														Alcohol	3 mL	0.0066
														Strips	1	0.94
														Paracetamol 500mg	8	0.032
													Nursing time			Cost (€)	Time (seconds)
														Preparation of the material		0.2745	30
														Explaining and informing the patient		0.2745	30
														Patient set-up/examination		0.549	60
														Washing of hands/gloves		0.549	60
														Application of compresses + bandages		0.2745	30
														Cleaning of trolley		0.41175	45
														Traceability		0.549	60
													Waste
														Waste management (g)	64	0.041424
														Total Cost Nursing Time		2.88225
														Total Cost Material		1.20717
														Total Cost for Complication		4.08942
													Dislodgement
														Supplies	Quantity	Price (€)	Time (seconds)
													Nursing time
														Change of sheets + patient installation		2.745	300
														Cleaning of the floor		2.745	300
														Total Cost for Complication		5.49

## Sheet: CHG Experimental
Experimental Group		First catheter placement					Catheter replacement (second catheter if suited)					Complications					Daily Use
			Supplies	Quantity	Price (€)	Time (seconds)	First catheter removal					Local infection / Phlebitis					3 nursing visits per day with flush and 1 intravenous treatment (IV) 3 times per day
		Hygiene						Supplies	Quantity	Price (€)	Time (seconds)	Treatment once a day for 3 days						Supplies	Quantity	Price (€)	Time (seconds)
			Pair of non-sterile gloves	1	0.14		Hygiene						Supplies	Quantity	Price (€)	Time (seconds)	Hygiene
			Hydro alcoholic solution	3 mL	0.007			Pair of non-sterile gloves	1	0.14		Hygiene						Pair of non-sterile gloves	3	0.42
			Surface disinfectant	10 mL	0.00015			Hydro alcoholic solution	3 mL	0.007			Pair of non-sterile gloves	1	0.14			Hydro alcoholic solution	3 mL x 3	0.021
			Wipe	1	0.02			Surface disinfectant	10 mL	0.00015			Hydro alcoholic solution	3 mL	0.007			Surface disinfectant	10 mL x 3	0.00045
		Venous catheter						Wipe	1	0.02			Surface disinfectant	10 mL	0.00015			Wipe	3	0.06
			Compresses (handling)	2	0.02		Removal						Wipe	1	0.02		Cleaning
			Antiseptic (handling)	3 mL	0.027			Compresses	1	0.01		Material						Pre-filled syringe	6	1.62
			Pre-filled syringe	1	0.27			Plasters	10 cm	0.0044			Compresses	2	0.02			Disinfectant cap	3	0.66
			Disinfectant cap	1	0.22		Nursing Time						Alcohol	3 mL	0.0066		Treatment
			Nexiva catheter	1	2.65			Preparation of the material		0.2745	30		Strips	1	0.94			Treatment	3
		Antiseptic (for skin)						Explaining and informing the patient		0.2745	30		Paracetamol 500mg	8	0.032		Nursing time
			Chloraprep	1	0.516			Installation of the patient		0.549	60	Nursing time						Preparation of the material		0.549	60
		Means of attachment						Hand washing/gloves		0.549	60		Preparation of the material		0.2745	30		Explaining and informing the patient		0.2745	30
			Polyurethane dressing	1	0.27			Removal of dressing/catheter+cleaning		0.41175	45		Explaining and informing the patient		0.2745	30		Patient set-up / inspection of the puncture site		0.549	60
			Adhesive strips	1	0.3		Waste						Patient set-up/examination		0.549	60		Hand washing / Gloves		0.549	60
		Nursing time (seconds)			Cost (€)	Time (seconds)		Waste management (g)	30	0.0194175			Washing of hands/gloves		0.549	60		Purge tubing		0.0915	10
			Verification of the prescription		0.2745	30							Application of compresses + bandages		0.2745	30		Treatment injection		0.2745	30
			Preparation of the material		0.8235	90		Total Cost Nursing Time			2.05875		Cleaning of trolley		0.41175	45		2 Flush / test		0.13725	15
			Explain and inform the patient		0.2745	30		Total Cost Material			0.200968		Traceability		0.549	60		Recalibrate infusion rate		0.0915	10
			Installation of the patient		0.549	60		Total Cost First catheter Removal			2.25972	Waste						Cleaning of trolley		0.41175	45
			Washing of hands / gloves		0.549	60							Waste management (g)	192	0.124272			Traceability		0.549	60
			Opening the material		0.2745	30	Second catheter placement										Waste
			Assembling valve and antiseptic cap		0.13725	15		Supplies	Quantity	Price (€)	Time (seconds)		Total Cost Nursing Time	x 3	8.64675			Waste management (g)	96	0.062136
			Locating the vein		0.2745	30	Hygiene						Total Cost Material	x 3	3.62152
			Application of antiseptic		0.41175	45		Pair of non-sterile gloves	1	0.14			Total Cost for Complication		12.2683			Total Cost Nursing Time	x 3	10.431
			Catheter placement		0.549	60		Hydro alcoholic solution	3 mL	0.007								Total Cost Material		2.84359
			Flushing the catheter / Flush		0.13725	15	Venous catheter					Occlusion						Total Cost for daily use		13.2746
			Fixing the catheter / dressing		0.2745	30		Compresses (handling)	2	0.02			Supplies	Quantity	Price (€)	Time (seconds)
			Cleaning the trolley		0.41175	45		Antiseptic (handling)	3 mL	0.027		Hygiene
			Traceability		0.549	60		Pre-filled syringe	1	0.27			Pair of non-sterile gloves	1	0.14
		Waste					600	Disinfectant cap	1	0.22			Hydro alcoholic solution	3 mL	0.007
			Waste management (g)	53	0.0343043			Nexiva catheter	1	2.65			Surface disinfectant	10 mL	0.00015
							Antiseptic (for skin)						Wipe	1	0.02
			Total Cost Nursing Time			5.49		Chloraprep	1	0.516		Material
			Total Cost Material			4.47445	Means of attachment						Compresses (handling)	2	0.02
			Total Cost for first catheter placement			9.96445		Polyurethane dressing	1	0.27			Antiseptic (handling)	3 mL	0.027
								Adhesive strips	1	0.3			Needle 18G	1	0.01
							Temps infirmiers			Cost (€)	Time (seconds)		Saline 10 mL	1	0.07
								Preparation of the material		0.8235	90		Syringe 10 mL	1	0.04
								Explanation and information to the patient		0.2745	30	Nursing time			Cost (€)	Time (seconds)
								Installation of the patient		0.549	60		Preparation of the material		0.549	60
								Washing of hands / gloves		0.549	60		Explaining and informing the patient		0.2745	30
								Opening the material		0.2745	30		Installation of the patient		0.549	60
								Assembling valve and antiseptic cap		0.13725	15		Washing of hands / gloves		0.549	60
								Locating the vein		0.549	60		Syringe preparation		0.13725	15
								Application of antisetpics		0.41175	45		Flush / test		0.2745	30
								Catheter placement		0.8235	90		Cleaning of trolley		0.41175	45
								Rinsing the catheter / flushing		0.13725	15		Traceability		0.549	60
								Fixing the catheter / dressing		0.2745	30	Waste
								Cleaning the trolley		0.41175	45		Waste management (g)	48	0.031068
								Traceability (removal and insertion)		0.549	60
							Waste						Total Cost Nursing Time		3.294
								Waste management (g)	39	0.0252428			Total Cost Material		0.365218
													Total Cost for Complication		3.65922
								Total Cost Nursing Time		5.7645
								Total Cost Material		4.44524		Diffusion
								Total Cost for second catheter placement		10.2097		Treatment once a day for 1 day
CHG: Chlorhexidine Gluconate gel													Supplies	Quantity	Price (€)	Time (seconds)
												Hygiene
													Pair of non-sterile gloves	1	0.14
													Hydro alcoholic solution	3 mL	0.007
													Surface disinfectant	10 mL	0.00015
													Wipe	1	0.02
												Material
													Compresses	2	0.02
													Alcohol	3 mL	0.0066
													Strips	1	0.94
													Paracetamol 500mg	8	0.032
												Nursing time			Cost (€)	Time (seconds)
													Preparation of the material		0.2745	30
													Explaining and informing the patient		0.2745	30
													Patient set-up/examination		0.549	60
													Washing of hands/gloves		0.549	60
													Application of compresses + bandages		0.2745	30
													Cleaning of trolley		0.41175	45
													Traceability		0.549	60
												Waste
													Waste management (g)	64	0.041424
													Total Cost Nursing Time		2.88225
													Total Cost Material		1.20717
													Total Cost for Complication		4.08942
												Dislodgement
													Supplies	Quantity	Price (€)	Time (seconds)
												Nursing time
													Change of sheets + patient installation		2.745	300
													Cleaning of the floor		2.745	300
													Total Cost for Complication		5.49

## Sheet: PVI Control
Control Group		First catheter placement					Catheter replacement (second catheter if suited)					Complications					Daily Use
			Supplies	Quantity	Price (€)	Time (seconds)	First catheter removal					Local infection / Phlebitis					3 nursing visits per day with flush and 1 intravenous treatment (IV) 3 times per day
		Hygiene						Supplies	Quantity	Price (€)	Time (seconds)	Treatment once a day for 3 days						Supplies	Quantity	Price (€)	Time (seconds)
			Pair of non-sterile gloves	1	0.14		Hygiene						Supplies	Quantity	Price (€)	Time (seconds)	Hygiene
			Hydro alcoholic solution	3 mL	0.007			Pair of non-sterile gloves	1	0.14		Hygiene						Pair of non-sterile gloves	3	0.42
			Surface disinfectant	10 mL	0.00015			Hydro alcoholic solution	3 mL	0.007			Pair of non-sterile gloves	1	0.14			Hydro alcoholic solution	3 mL x 3	0.021
			Wipe	1	0.02			Surface disinfectant	10 mL	0.00015			Hydro alcoholic solution	3 mL	0.007			Surface disinfectant	10 mL x 3	0.00045
		Infusion line						Wipe	1	0.02			Surface disinfectant	10 mL	0.00015			Wipe	3	0.06
			Tubing + 3-way valve	1	0.35		Removal						Wipe	1	0.02		Cleaning
			Solute	1	0.62			Compresses	1	0.01		Material						Antiseptic (handling)	3 mL x 3	0.12
		Venous catheter						Plasters	10 cm	0.0044			Compresses	2	0.02			Compresses (handling)	2 x 3	0.06
			Insyte Autogard Catheter	1	0.53		Nursing Time						Alcohol	3 mL	0.0066			Tap stoppers	3	0.09
		Antiseptic (for skin)						Preparation of the material		0.2745	30		Strips	1	0.94		Treatment
			Alcoholic Betadine	3 mL	0.04			Explaining and informing the patient		0.2745	30		Paracetamol 500mg	8	0.032			Solute	1	0.62
			Compresses	2	0.02			Installation of the patient		0.549	60	Nursing time			Cost (€)	Time (seconds)	Nursing time			Cost (€)	Time (seconds)
		Means of attachment						Hand washing/gloves		0.549	60		Preparation of the material		0.2745	30		Preparation of the material		0.549	60
			Compresses (handling)	2	0.02			Removal of dressing/catheter+cleaning		0.41175	45		Explaining and informing the patient		0.2745	30		Explanation and information to the patient		0.2745	30
			Polyurethane dressing	1	0.27		Waste						Patient set-up/examination		0.549	60		Patient set-up / puncture site inspection		0.549	60
			Adhesive strips	1	0.3			Waste management (g)	117	0.0757283			Washing of hands/gloves		0.549	60		Washing of hands / gloves		0.549	60
		Nursing time (seconds)			Cost (€)	Time (seconds)							Application of compresses + bandages		0.2745	30		Disinfection of Treatment injection site		0.2745	30
			Verification of the prescription		0.2745	30		Total Cost Nursing Time		2.05875			Cleaning of trolley		0.41175	45		Drain tubing		0.0915	10
			Preparation of the material		0.8235	90		Total Cost Material		0.257278			Traceability		0.549	60		Treatment injection		0.2745	30
			Explain and inform the patient		0.2745	30		Total Cost First catheter Removal		2.31603		Waste						Recalibrate infusion rate		0.0915	10
			Installation of the patient		0.549	60							Waste management (g)	192	0.124272			Cleaning of trolley		0.41175	45
			Washing of hands / gloves		0.549	60	Second catheter placement											Traceability		0.549	60
			Purge tubing		0.13725	15		Supplies	Quantity	Price (€)	Time (seconds)		Total Cost Nursing Time	x3	8.64675		Waste
			Opening the material		0.2745	30	Hygiene						Total Cost Material	x3	3.62152			Waste management (g)	143	0.0925568
			Locating the vein		0.2745	30		Pair of non-sterile gloves	1	0.14			Total Cost for Complication		12.2683
			Antispasmodic application		0.41175	45		Hydro alcoholic solution	3 mL	0.007								Total Cost Nursing Time	x 3	10.8428
			Placement of the catheter		0.549	60	Infusion line					Occlusion						Total Cost Material		1.48401
			Connecting the infusion line		0.13725	15		Tubing + 3-way valve	1	0.35			Supplies	Quantity	Price (€)	Time (seconds)		Total Cost for daily use		12.3268
			Fixation of the catheter / dressing		0.2745	30		Solute	1	0.62		Hygiene
			Checking the patency of the vascular access		0.13725	15	Venous catheter						Pair of non-sterile gloves	1	0.14
			Cleaning		0.41175	45	555	Insyte Autogard Catheter	1	0.53			Hydro alcoholic solution	3 mL	0.007
			Traceability		0.549	60	Antiseptic (for skin)						Surface disinfectant	10 mL	0.00015
		Waste						Alcoholic Betadine	3 mL	0.04			Wipe	1	0.02
			Waste management (g)	44	0.028479			Compresses	2	0.02		Material
							Means of attachment						Compresses (handling)	2	0.02
			Total Cost Nursing Time		5.62725			Compresses (handling)	2	0.02			Antiseptic (handling)	3 mL	0.027
			Total Cost Material		2.34563			Polyurethane dressing	1	0.27			Needle 18G	1	0.01
			Total Cost for first catheter placement		7.97288			Adhesive strips	1	0.3			Saline 10 mL	1	0.07
							Nursing time			Cost (€)	Time (seconds)		Syringe 10 mL	1	0.04
								Verification of the prescription		0.2745	30	Nursing time			Cost (€)	Time (seconds)
								Installation of the patient		0.549	60		Preparation of the material		0.549	60
								Preparation of the material		0.8235	90		Explaining and informing the patient		0.2745	30
								Washing of hands / gloves		0.549	60		Installation of the patient		0.549	60
								Purge tubing		0.13725	15		Washing of hands / gloves		0.549	60
								Opening the material		0.2745	30		Syringe preparation		0.13725	15
								Location of the vein		0.549	60		Flush / test		0.2745	30
								Application of antispasmodic agents		0.41175	45		Cleaning of trolley		0.41175	45
								Catheter placement		0.8235	90		Traceability		0.549	60
								Connection of the infusion line		0.13725	15	Waste
								Fixation of the catheter / dressing		0.2745	30		Waste management (g)	48	0.031068
								Checking the patency of the vascular access		0.13725	15
								Cleaning		0.41175	45		Total Cost Nursing Time		3.294
								Traceability (removal and insertion)		0.549	60		Total Cost Material		0.365218
							Waste						Total Cost for Complication		3.65922
								Waste management (g)	30	0.0194175
												Diffusion
								Total Cost Nursing Time		5.90175		Treatment once a day for 1 day
								Total Cost Material		2.31642			Supplies	Quantity	Price (€)	Time (seconds)
								Total Cost for second catheter placement		8.21817		Hygiene
													Pair of non-sterile gloves	1	0.14
PVI: povidone iodine-alcohol solution													Hydro alcoholic solution	3 mL	0.007
													Surface disinfectant	10 mL	0.00015
													Wipe	1	0.02
												Material
													Compresses	2	0.02
													Alcohol	3 mL	0.0066
													Strips	1	0.94
													Paracetamol 500mg	8	0.032
												Nursing time			Cost (€)	Time (seconds)
													Preparation of the material		0.2745	30
													Explaining and informing the patient		0.2745	30
													Patient set-up/examination		0.549	60
													Washing of hands/gloves		0.549	60
													Application of compresses + bandages		0.2745	30
													Cleaning of trolley		0.41175	45
													Traceability		0.549	60
												Waste
													Waste management (g)	64	0.041424
													Total Cost Nursing Time		2.88225
													Total Cost Material		1.20717
													Total Cost for Complication		4.08942
												Dislodgement
													Supplies	Quantity	Price (€)	Time (seconds)
												Nursing time
													Change of sheets + patient installation		2.745	300
													Cleaning of the floor		2.745	300
													Total Cost for Complication		5.49

## Sheet: PVI Experimental
Experimental Group		First catheter placement					Catheter replacement (second catheter if suited)					Complications					Daily Use
			Supplies	Quantity	Price (€)	Time (seconds)	First catheter removal					Local infection / Phlebitis					3 nursing visits per day with flush and 1 intravenous treatment (IV) 3 times per day
		Hygiene						Supplies	Quantity	Price (€)	Time (seconds)	Treatment once a day for 3 days						Supplies	Quantity	Price (€)	Time (seconds)
			Pair of non-sterile gloves	1	0.14		Hygiene						Supplies	Quantity	Price (€)	Time (seconds)	Hygiene
			Hydro alcoholic solution	3 mL	0.007			Pair of non-sterile gloves	1	0.14		Hygiene						Pair of non-sterile gloves	3	0.42
			Surface disinfectant	10 mL	0.00015			Hydro alcoholic solution	3 mL	0.007			Pair of non-sterile gloves	1	0.14			Hydro alcoholic solution	3 mL x 3	0.021
			Wipe	1	0.02			Surface disinfectant	10 mL	0.00015			Hydro alcoholic solution	3 mL	0.007			Surface disinfectant	10 mL x 3	0.00045
		Venous catheter						Wipe	1	0.02			Surface disinfectant	10 mL	0.00015			Wipe	3	0.06
			Compresses (handling)	2	0.02		Removal						Wipe	1	0.02		Cleaning
			Antiseptic (handling)	3 mL	0.027			Compresses	1	0.01		Material						Pre-filled syringe	6	1.62
			Pre-filled syringe	1	0.27			Plasters	10 cm	0.0044			Compresses	2	0.02			Disinfectant cap	3	0.66
			Disinfectant cap	1	0.22		Nursing Time						Alcohol	3 mL	0.0066		Treatment
			Nexiva catheter	1	2.65			Preparation of the material		0.2745	30		Strips	1	0.94			Treatment	3
		Antiseptic (for skin)						Explaining and informing the patient		0.2745	30		Paracetamol 500mg	8	0.032		Nursing time
			Alcoholic Betadine	3 mL	0.04			Installation of the patient		0.549	60	Nursing time						Preparation of the material		0.549	60
			Compresses	2	0.02			Hand washing/gloves		0.549	60		Preparation of the material		0.2745	30		Explaining and informing the patient		0.2745	30
		Means of attachment						Removal of dressing/catheter+cleaning		0.41175	45		Explaining and informing the patient		0.2745	30		Patient set-up / inspection of the puncture site		0.549	60
			Polyurethane dressing	1	0.27		Waste						Patient set-up/examination		0.549	60		Hand washing / Gloves		0.549	60
			Adhesive strips	1	0.3			Waste management (g)	30	0.0194175			Washing of hands/gloves		0.549	60		Purge tubing		0.0915	10
		Nursing time (seconds)			Cost (€)	Time (seconds)							Application of compresses + bandages		0.2745	30		Treatment injection		0.2745	30
			Verification of the prescription		0.2745	30		Total Cost Nursing Time		2.05875			Cleaning of trolley		0.41175	45		2 Flush / test		0.13725	15
			Preparation of the material		0.8235	90		Total Cost Material		0.200968			Traceability		0.549	60		Recalibrate infusion rate		0.0915	10
			Explain and inform the patient		0.2745	30		Total Cost First catheter Removal		2.25972		Waste						Cleaning of trolley		0.41175	45
			Installation of the patient		0.549	60							Waste management (g)	192	0.124272			Traceability		0.549	60
			Washing of hands / gloves		0.549	60	Second catheter placement										Waste
			Opening the material		0.2745	30		Supplies	Quantity	Price (€)	Time (seconds)		Total Cost Nursing Time	x 3	8.64675			Waste management (g)	96	0.062136
			Assembling valve and antiseptic cap		0.13725	15	Hygiene						Total Cost Material	x 3	3.62152
			Locating the vein		0.2745	30		Pair of non-sterile gloves	1	0.14			Total Cost for Complication		12.2683			Total Cost Nursing Time	x 3	10.431
			Application of antiseptic		0.41175	45		Hydro alcoholic solution	3 mL	0.007								Total Cost Material		2.84359
			Catheter placement		0.549	60	Venous catheter					Occlusion						Total Cost for daily use		13.2746
			Flushing the catheter / Flush		0.13725	15		Compresses (handling)	2	0.02			Supplies	Quantity	Price (€)	Time (seconds)
			Fixing the catheter / dressing		0.2745	30		Antiseptic (handling)	3 mL	0.027		Hygiene
			Cleaning the trolley		0.41175	45		Pre-filled syringe	1	0.27			Pair of non-sterile gloves	1	0.14
			Traceability		0.549	60		Disinfectant cap	1	0.22			Hydro alcoholic solution	3 mL	0.007
		Waste						Nexiva catheter	1	2.65			Surface disinfectant	10 mL	0.00015
			Waste management (g)	53	0.0343043		Antiseptic (for skin)						Wipe	1	0.02
								Alcoholic Betadine	3 mL	0.04		Material
			Total Cost Nursing Time		5.49			Compresses	2	0.02			Compresses (handling)	2	0.02
			Total Cost Material		4.01845		Means of attachment						Antiseptic (handling)	3 mL	0.04
			Total Cost for first catheter placement		9.50845			Polyurethane dressing	1	0.27			Needle 18G	1	0.01
								Adhesive strips	1	0.3			Saline 10 mL	1	0.07
							Temps infirmiers						Syringe 10 mL	1	0.04
								Preparation of the material		0.8235	90	Nursing time
								Explanation and information to the patient		0.2745	30		Preparation of the material		0.549	60
								Installation of the patient		0.549	60		Explaining and informing the patient		0.2745	30
								Washing of hands / gloves		0.549	60		Installation of the patient		0.549	60
								Opening the material		0.2745	30		Washing of hands / gloves		0.549	60
								Assembling valve and antiseptic cap		0.13725	15		Syringe preparation		0.13725	15
								Locating the vein		0.549	60		Flush / test		0.2745	30
								Application of antisetpics		0.41175	45		Cleaning of trolley		0.41175	45
								Catheter placement		0.8235	90		Traceability		0.549	60
								Rinsing the catheter / flushing		0.13725	15	Waste
								Fixing the catheter / dressing		0.2745	30		Waste management (g)	48	0.031068
								Cleaning the trolley		0.41175	45
								Traceability (removal and insertion)		0.549	60		Total Cost Nursing Time		3.294
							Waste						Total Cost Material		0.378218
								Waste management (g)	39	0.0252428			Total Cost for Complication		3.67222
								Total Cost Nursing Time		5.7645		Diffusion
								Total Cost Material		3.98924		Treatment once a day for 1 day
								Total Cost for second catheter placement		9.75374			Supplies	Quantity	Price (€)	Time (seconds)
PVI: povidone iodine-alcohol solution												Hygiene
													Pair of non-sterile gloves	1	0.14
													Hydro alcoholic solution	3 mL	0.007
													Surface disinfectant	10 mL	0.00015
													Wipe	1	0.02
												Material
													Compresses	2	0.02
													Alcohol	3 mL	0.0066
													Strips	1	0.94
													Paracetamol 500mg	8	0.032
												Nursing time			Cost (€)	Time (seconds)
													Preparation of the material		0.2745	30
													Explaining and informing the patient		0.2745	30
													Patient set-up/examination		0.549	60
													Washing of hands/gloves		0.549	60
													Application of compresses + bandages		0.2745	30
													Cleaning of trolley		0.41175	45
													Traceability		0.549	60
												Waste
													Waste management (g)	64	0.041424
													Total Cost Nursing Time		2.88225
													Total Cost Material		1.20717
													Total Cost for Complication		4.08942
												Dislodgement
													Supplies	Quantity	Price (€)	Time (seconds)
												Nursing time
													Change of sheets + patient installation		2.745	300
													Cleaning of the floor		2.745	300
													Total Cost for Complication		5.49

## Sheet: Unit Price
Unit Price (Euro)
	Hydroalcoholic gel		3mL	0.007			167 doses per 500mL bottle
	Tego		10 mL	0.00015			4000 mL	0.06
	Alcohol (dressing)		3mL	0.0066			250 mL	0.55
	Chlorhex (handling)		3mL	0.027			125 mL	1.14
	Plasters		10 cm	0.0044			900 mL	0.4
	Beta compress / disinfection		3 mL	0.04			125 mL	1.73
	Pair of gloves			0.14
						Waste management
	Tubing + 3 way tap			0.35			647.25	1000000
						per g	0.00064725
	NacL 500 mL			0.62
	Catheter autoguard			0.53		Cost for Nursing time
							50,925€/year	1,547 hours
	Compress			0.01		cost per minute	0.549	Euro
	Tegaderm dressing			0.27
	Adhesive strips			0.3
	Cleaning wipes			0.02
	Chloraprep			0.516
	Needle 18G			0.01
	Syringe 10 mL			0.04
	Holding strip			0.94
	Nexiva catheter			2.65
	Pre-filled syringe			0.27
	Antiseptic caps			0.22

## Sheet: Summary
Summary
		n	249	n	247	n	246	n	247
	Euro	CHG Control		CHG Experimental		PVI Control		PVI Experimental
	First catheter placement	8.42888		9.96445		7.97288		9.50845			8.20088	9.73645
	Catheter Removal	2.31603		2.25972		2.31603		2.25972			2.31603	2.25972
	Catheter Replacement	8.67223		10.2097		8.21817		9.75374			8.4452	9.98174
	Phlebitis or local infection	12.2683		12.2683		12.2683		12.2683			12.2683	12.2683
	Occlusion	3.65922		3.65922		3.65922		3.67222			3.65922	3.66572
	Diffusion	4.08942		4.08942		4.08942		4.08942			4.08942	4.08942
	Dislodgement	5.49		5.49		5.49		5.49			5.49	5.49
	Daily use	12.2878		13.2746		12.3268		13.2746			12.3073	13.2746
Patient pathway
				Days (n)	4	for example
	Euro	CHG Control		CHG Experimental		PVI Control		PVI Experimental
	First catheter placement	8.42888		9.96445		7.97288		9.50845
	Catheter Removal	2.31603		2.25972		2.31603		2.25972
	Daily use	12.2878		13.2746		12.3268		13.2746
	Total	59.8959		65.3225		59.5959		64.8665
	Total cost of a catheter scheduled for removal after n days of treatment: initial placement, n days of treatment and removal
				Days (n)	4	for example
	Euro	CHG Control		CHG Experimental		PVI Control		PVI Experimental
	First catheter placement	8.42888		9.96445		7.97288		9.50845
	Catheter Removal	2.31603		2.25972		2.31603		2.25972
	Dislodgement	5.49		5.49		5.49		5.49
	Catheter Replacement	8.67223		10.2097		8.21817		9.75374
	Daily use	12.2878		13.2746		12.3268		13.2746
	Total	76.3742		83.282		75.6201		82.37
	Total cost of a catheter that is accidentally removed (dislodgement) after n days of treatment: initial placement, n days of treatment, removal of the failed catheter, management of the accidental removal, and removal of the second catheter
				Days (n)	4	for example
	Euro	CHG Control		CHG Experimental		PVI Control		PVI Experimental
	First catheter placement	8.42888		9.96445		7.97288		9.50845
	Catheter Removal	2.31603		2.25972		2.31603		2.25972
	Daily use	12.2878		13.2746		12.3268		13.2746
	Total	59.8959		65.3225		59.5959		64.8665
	Total cost of an unnecessary catheter after n days of treatment: initial placement, n days of treatment and removal
				Days (n)	4	for example
	Euro	CHG Control		CHG Experimental		PVI Control		PVI Experimental
	Catheter placement	8.42888		9.96445		7.97288		9.50845
	Catheter Removal	2.31603		2.25972		2.31603		2.25972
	Daily use	12.2878		13.2746		12.3268		13.2746
	Total	59.8959		65.3225		59.5959		64.8665
	Total cost of a catheter in a patient who died after n days of treatment: initial placement, n days of treatment and removal
				Days (n)	4	for example
	Euro	CHG Control		CHG Experimental		PVI Control		PVI Experimental
	First catheter placement	8.42888		9.96445		7.97288		9.50845
	Catheter Removal	2.31603		2.25972		2.31603		2.25972
	Catheter Replacement	8.67223		10.2097		8.21817		9.75374
	Phlebitis	12.2683		12.2683		12.2683		12.2683
	Daily use	12.2878		13.2746		12.3268		13.2746
	Total	83.1525		90.0602		82.3984		89.1482
	Total cost of a catheter with a non-infectious complication (phlebitis): initial placement, n days of treatment, replacement catheter placement, removal of the catheter with a complication, management of the complication, and removal of the second catheter
				Days (n)	1	for example
	Euro	CHG Control		CHG Experimental		PVI Control		PVI Experimental
	First catheter placement	8.42888		9.96445		7.97288		9.50845
	Catheter Removal	2.31603		2.25972		2.31603		2.25972
	Catheter Replacement	8.67223		10.2097		8.21817		9.75374
	Diffusion	4.08942		4.08942		4.08942		4.08942
	Daily use	12.2878		13.2746		12.3268		13.2746
	Total	38.1103		42.0576		37.2393		41.1456
	Total cost of a catheter with a non-infectious complication (Diffusion): initial placement, n days of treatment, replacement catheter placement, removal of the catheter with a complication, management of the complication and removal of the second catheter
				Days (n)	4	for example
	Euro	CHG Control		CHG Experimental		PVI Control		PVI Experimental
	First catheter placement	8.42888		9.96445		7.97288		9.50845
	Catheter Removal	2.31603		2.25972		2.31603		2.25972
	Catheter Replacement	8.67223		10.2097		8.21817		9.75374
	Infection locale	12.2683		12.2683		12.2683		12.2683
	Daily use	12.2878		13.2746		12.3268		13.2746
	Total	83.1525		90.0602		82.3984		89.1482
	Total cost of a catheter with an infectious complication (local infection): initial placement, n days of treatment, replacement catheter placement, removal of the catheter with a complication, management of the complication and removal of the second catheter
				Days (n)	4	for example
	Euro	CHG Control		CHG Experimental		PVI Control		PVI Experimental
	First catheter placement	8.42888		9.96445		7.97288		9.50845
	Catheter Removal	2.31603		2.25972		2.31603		2.25972
	Catheter Replacement	8.67223		10.2097		8.21817		9.75374
	Occlusion	3.65922		3.65922		3.65922		3.67222
	Daily use	12.2878		13.2746		12.3268		13.2746
	Total	74.5434		81.4512		73.7893		80.5522
	Total cost of a catheter with occlusion: including initial placement, n days of treatment, management of the occlusion, one replacement catheter placement, one removal of the occluded catheter and one removal of the second catheter

## Sheet: Weighted Summary
Weighted Summary
		SDs Group		BDs Group		costs for R software
	First catheter placement	8.20226		9.73645		State 1
	Catheter Removal	2.31603		2.25972		Event 4-8	Event 2-3
	Catheter Replacement	8.44657		9.98174		Event 4-8
total cost	Treatment for Phlebitis or local infection	12.2683		12.2683		Event 5/7
total cost	Treatment for Occlusion	3.65922		3.66572		Event 8
total cost	Treatment for Diffusion	4.08942		4.08942		Event 6
total cost	Treatment for Dislodgement	5.49		5.49		Event 4
24 hours	Daily Use	12.3071		13.2746		State 1
Patient pathway
Event 1.1	Euro	SDs Group		BDs Group
	First catheter placement	8.20226		9.73645
	Catheter Removal	2.31603		2.25972
	Total	10.5183		11.9962
	+Daily use (* n days)	12.3071		13.2746
	Total cost of a catheter scheduled for removal after n days of treatment: initial placement, n days of treatment and removal
Event 1.2	Euro	SDs Group		BDs Group
	First catheter placement	8.20226		9.73645
	Catheter Removal	2.31603		2.25972
	Total	10.5183		11.9962
	+Daily use (* n days)	12.3071		13.2746
	Total cost of an unnecessary catheter after n days of treatment: initial placement, n days of treatment and removal
Event 1.3	Euro	DM Standard		DM Innovant
	First catheter placement	8.20226		9.73645
	Catheter Removal	2.31603		2.25972
	Total	10.5183		11.9962
	+Daily use (* n days)	12.3071		13.2746
	Total cost of a catheter whose removal is related to a suspected infection after n days of treatment: initial insertion, n days of treatment and removal
Event 1.4	Euro	SDs Group		BDs Group
	First catheter placement	8.20226		9.73645
	Catheter Removal	2.31603		2.25972
	Dislodgement	5.49		5.49
	Catheter Replacement	8.44657		9.98174
	Total	26.7709		29.7276
	+Daily use (* n days)	12.3071		13.2746
	Total cost of a catheter that is accidentally removed (dislodgement) after n days of treatment: initial placement, n days of treatment, removal of the failed catheter, management of the accidental removal, and removal of the second catheter
		18.5686		19.9912
		16.2526		17.7315
Event 1.5	Euro	SDs Group		BDs Group
	First catheter placement	8.20226		9.73645
	Catheter Removal	2.31603		2.25972
	Catheter Replacement	8.44657		9.98174
	Phlebitis	12.2683		12.2683
	Total	33.5492		36.5059
	+Daily use (* n days)	12.3071		13.2746
	Total cost of a catheter with a non-infectious complication (phlebitis): initial placement, n days of treatment, replacement catheter placement, removal of the catheter with a complication, management of the complication, and removal of the second catheter
		25.3469		26.7694
		23.0309		24.5097
Event 1.6	Euro	SDs Group		BDs Group
	First catheter placement	8.20226		9.73645
	Catheter Removal	2.31603		2.25972
	Catheter Replacement	8.44657		9.98174
	Diffusion	4.08942		4.08942
	Total	25.3703		28.3271
	+Daily use (* n days)	12.3071		13.2746
	Total cost of a catheter with a non-infectious complication (Diffusion): initial placement, n days of treatment, replacement catheter placement, removal of the catheter with a complication, management of the complication and removal of the second catheter
		17.1681		18.5906
		14.852		16.3309
Event 1.7	Euro	SDs Group		BDs Group
	First catheter placement	8.20226		9.73645
	Catheter Removal	2.31603		2.25972
	Catheter Replacement	8.44657		9.98174
	Local infection	12.2683		12.2683
	Total	33.5492		36.5059
	+Daily use (* n days)	12.3071		13.2746
	Total cost of a catheter with an infectious complication (local infection): initial placement, n days of treatment, replacement catheter placement, removal of the catheter with a complication, management of the complication and removal of the second catheter
		25.3469		26.7694
		23.0309		24.5097
Event 1.8		DM Standard		DM Innovant
	First catheter placement	8.20226		9.73645
	Catheter Removal	2.31603		2.25972
	Catheter Replacement	8.44657		9.98174
	Occlusion	3.65922		3.66572
	Total	24.9401		27.9033
	+Daily use (* n days)	12.3071		13.2746
	Total cost of a catheter with occlusion: including initial placement, n days of treatment, management of the occlusion, one replacement catheter placement, one removal of the occluded catheter and one removal of the second catheter
		16.7378		18.1669
		14.4218		15.9072
State 4/5	Euro	SDs Group		BDs Group
	Catheter placement	8.20226		9.73645
	Catheter Removal	2.31603		2.25972
	Total	10.5183		11.9962
	+Daily use (* n days)	12.3071		13.2746
	Total cost of a catheter in a patient who discharged or died after n days of treatment: initial placement, n days of treatment and removal

## Sheet: Table_Article
Markov State / Event*	Costs for 1 patient SDs	Costs for 1 patient BDs
	Euro 2022	Euro 2022
1. No Events*/ 1st PVC/1st day	30.7641	29.9144
State 1. No Events*/ 1st PVC	18.4607	17.257
1.1 Event 1.1	3.47404	2.93763
1.2 Event 1.2	3.47404	2.93763
1.3 Event 1.3	3.47404	2.93763
State 2. No Events*/ No PVC	0	0
1.4 Event 1.4	24.3789	23.0509
1.5 Event 1.5	34.5463	31.8627
1.6 Event 1.6	22.278	21.2301
1.7 Event 1.7	34.5463	31.8627
1.8 Event 1.8	21.6327	20.6793
State 3. No Events*/ 2nd PVC	18.4607	17.257
State 4. Discharge	3.47404	2.93763
State 5. Death	3.47404	2.93763
PVC: Peripheral Venous Catheter
* Events: Event 1.1 scheduled PVC removal; Event 1.2 useless PVC; Event 1.3 suspected infection; Event 1.4 Dislodgement; Event 1.5 phlebitis; Event 1.6 diffusion; Event 1.7 local infection; Event 1.8 occlusion
